# Supplementary material for: A Bilayer Vaginal Tablet for the Localized Delivery of Disulfiram and 5-Fluorouracil to the Cervix
Source: PubMed Central journal article supplement (PMC7762309; doi:10.3390/pharmaceutics12121185), 2020-12-06
Supplement: pharmaceutics-12-01185-s001.pdf [file pharmaceutics-12-01185-s001.pdf]

# A Bilayer Vaginal Tablet for the Localized Delivery of Disulfiram and 5-Fluorouracil to the Cervix

Ismiin Zainol Abidin, Emanuele Rezoagli, Bianca Simonassi-Paiva, Gustavo Waltzer Fehrenbach, Kevin Masterson, Robert Pogue, Zhi Cao, Neil Rowan, Emma J. Murphy and Ian Major

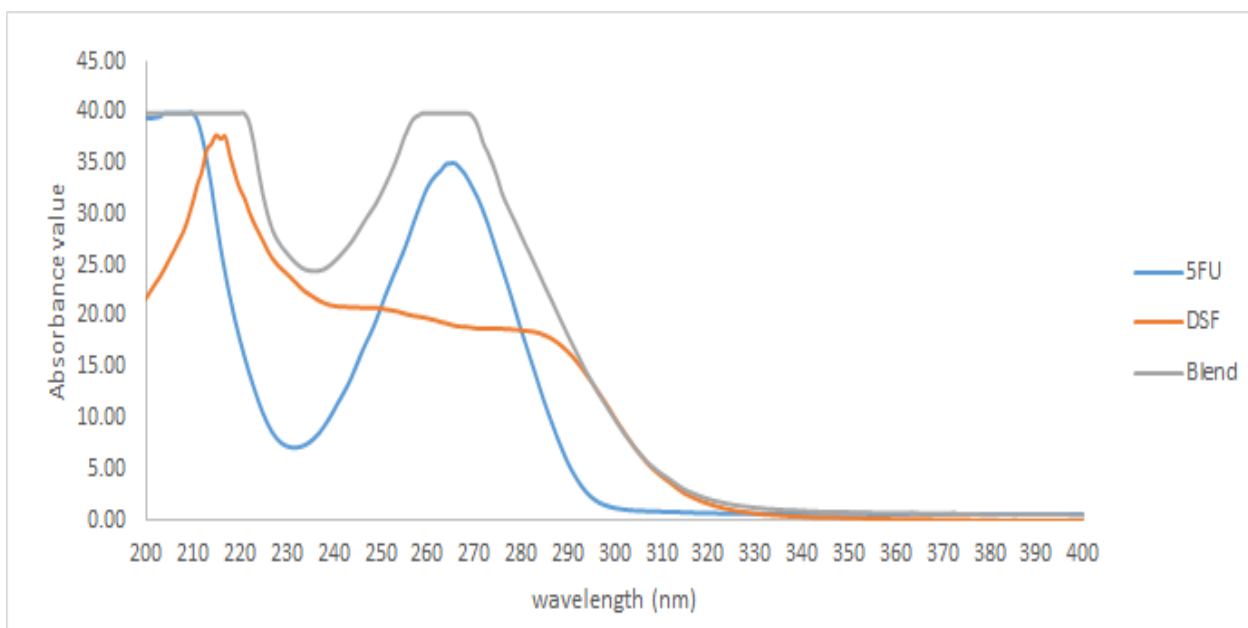

**Figure S1.** Scan of UV spectrum of 5-FU, DSF and as a blend from 200 to 400 nm.
